# Supplementary material
Source: PubMed Central journal article supplement (PMC6957290)
Supplement: ehp-127-127001-s001.pdf [file ehp-127-127001-s001.pdf]

**Note to readers with disabilities:** *EHP* strives to ensure that all journal content is accessible to all readers. However, some figures and Supplemental Material published in *EHP* articles may not conform to [508 standards](#) due to the complexity of the information being presented. If you need assistance accessing journal content, please contact [ehp508@niehs.nih.gov](mailto:ehp508@niehs.nih.gov). Our staff will work with you to assess and meet your accessibility needs within 3 working days.

### **Supplemental Material**

#### **Multiple Sources of the Outbreak of Legionnaires' Disease in Genesee County, Michigan, in 2014 and 2015**

Anya F. Smith, Anke Huss, Samuel Dorevitch, Leo Heijnen, Vera H. Arntzen, Megan Davies, Mirna Robert-Du Ry van Beest Holle, Yuki Fujita, Antonie M. Verschoor, Bernard Raterman, Frank Oosterholt, Dick Heederik, and Gertjan Medema

#### **Table of Contents**

##### **Independent review panel**

**Table S1.** Parameter values for horizontal atmospheric stability.

**Table S2.** Parameter values for vertical atmospheric stability.

**Table S3.** Clinical *Legionella pneumophila* isolates ID, hospital A exposure status, Sequence type, NCBI SAMN number.

**Table S4.** Environmental *Legionella pneumophila* isolates from hospital A: ID, site, NCBI number.

**Table S5.** Incidence rate ratio (IRR) of LD in Census block groups with a centroid >2 miles, 1-2 miles and <1 mile from aerosol sources (AS) in 2014 and 2015 using Genesee County population data (Census.gov 2015). Cases with onset between Dec 1, 2014 and Mar 1, 2015 were excluded as, generally, cooling towers are not operational in winter. A multilevel Poisson model was nested in Census block groups and adjusted for age group, sex, interaction factor for proximity and year. An interaction factor for City of Flint water at the residence and year was included to test for the sensitivity of the model to this exposure variable.

**Figure S1.** Crude incidence of Legionnaires' disease per 100.000 over the years 2009 – 2017 in the United State of America (USA, blue (National Notifiable Diseases Surveillance System)), in Michigan (without Genesee County MI-GC, green) and in Genesee County, MI (Genesee County, orange) based on recorded LD cases in the Michigan Disease Surveillance System and United States Census Bureau population data.

**Figure S2.** Results of free chlorine monitoring at eight fixed monitoring sites (1-8) in the distribution network throughout Flint. These sites were shops, businesses or community service centers where a City of Flint official went to take measurements and samples. X-axes show months in 2014 and 2015 (m-yy); y-axes show free chlorine concentration in mg per L. Red line is 0.2 mg/l, recommended best practice (American Water Works Association, 2007).

**Figure S3.** Results of the Gaussian plume model: spatial distribution of the highest impact aerosol sources (shown as squares), and the number of cases that are potentially impacted by each aerosol source (shown as color/shade) evaluated with intermediate aerosol concentration threshold ( $>0.0001\text{g/m}^2$ ). Aerosol exposure during hospital stays and visits were excluded.

## References

## Independent review panel

A panel of independent experts was invited to provide critical and frank review of the design of the outbreak investigation, the strength of evidence and completeness of the investigation and the results, conclusions and recommendations, the transparency of the study, appropriate use of data and methods, scientific quality and integrity. Three meetings were organized, in the design phase, mid-term and at the end of the study, in which the design, methods, results and conclusions were presented and reviewed. The manuscript of the paper was also reviewed by the expert panel.

The panel consisted of:

- Dr Mark Dworkin (University of Illinois at Chicago)
- Dr Lisa Fitzpatrick (George Washington University)
- Dr Philippe Hartemann (University of Lorraine, France)
- Dr Paul Hunter (University of East Anglia, England)
- Dr Tim Wade (US Environmental Protection Agency)

Panel members (except TW) were compensated upfront for the time they dedicated to the review.

**Table S1** Parameter values for horizontal atmospheric stability

| Pasquill Stability Category | X (km)    | a      | b       |
|-----------------------------|-----------|--------|---------|
| A* (Extremely unstable)     | <0.10     | 122.80 | 0.9447  |
|                             | 0.10-0.15 | 158.08 | 1.0542  |
|                             | 0.16-0.20 | 170.22 | 1.0932  |
|                             | 0.21-0.25 | 179.52 | 1.1262  |
|                             | 0.26-0.30 | 217.41 | 1.2644  |
|                             | 0.31-0.40 | 258.89 | 1.4094  |
|                             | 0.41-0.50 | 346.75 | 1.7283  |
|                             | 0.51-3.11 | 453.85 | 2.1166  |
|                             | >3.11     | **     | **      |
| B* (Moderately unstable)    | <0.20     | 90.673 | 0.93198 |
|                             | 0.21-0.40 | 98.483 | 0.98332 |
|                             | >0.40     | 109.30 | 1.09710 |
| C* (Slightly unstable)      | All       | 61.141 | 0.91465 |
| D (Neutral)                 | <0.30     | 34.459 | 0.86974 |
|                             | 0.31-1.0  | 32.093 | 0.81066 |
|                             | 1.01-3.0  | 32.093 | 0.64403 |
|                             | 3.01-10   | 33.504 | 0.60486 |
|                             | 10.01-30  | 36.650 | 0.56589 |
|                             | >30       | 44.053 | 0.51179 |
| E (Slightly stable)         | <0.10     | 24.260 | 0.8366  |
|                             | 0.11-0.30 | 23.331 | 0.81956 |
|                             | 0.31-1.0  | 21.628 | 0.75660 |
|                             | 1.01-2.0  | 21.628 | 0.63077 |
|                             | 2.01-4.0  | 22.534 | 0.57154 |
|                             | 4.01-10   | 24.703 | 0.50527 |
|                             | 10.01-20  | 26.970 | 0.46713 |
|                             | 20.01-40  | 35.420 | 0.37615 |
|                             | >40       | 47.618 | 0.29592 |
| F (Very stable)             | <0.20     | 15.209 | 0.81558 |
|                             | 0.21-0.7  | 14.457 | 0.78407 |
|                             | 0.71-1    | 13.953 | 0.68465 |
|                             | 1.01-2    | 13.953 | 0.63227 |
|                             | 2.01-3    | 14.823 | 0.54503 |
|                             | 3.01-7    | 16.187 | 0.46490 |
|                             | 7.01-15   | 17.836 | 0.41507 |
|                             | 15.01-30  | 22.651 | 0.32681 |
|                             | 30.01-60  | 27.074 | 0.27436 |
|                             | >60       | 34.219 | 0.21716 |

\* If the calculated value of  $\sigma_z$  exceeds 5000 m,  $\sigma_z$  is set to 5000 m. \*\*  $\sigma_z$  is equal to 5000 m.

**Table S2** Parameter values for vertical atmospheric stability

| Pasquill Stability Category | c      | d       |
|-----------------------------|--------|---------|
| A (Extremely unstable)      | 24.167 | 2.5334  |
| B (Moderately unstable)     | 18.333 | 1.8096  |
| C (Slightly unstable)       | 12.5   | 1.0857  |
| D (Neutral)                 | 8.333  | 0.72382 |
| E (Slightly stable)         | 6.25   | 0.54287 |
| F (Very stable)             | 4.1667 | 0.36191 |

**Table S3.** Clinical *Legionella pneumophila* isolates ID, hospital A exposure status, Sequence type, NCBI SAMN number.

| ID  | Hospital A exposure     | Sequence type | NCBI SAMN No. |
|-----|-------------------------|---------------|---------------|
| C01 | Y                       | 1             | 12730799      |
| C02 | Y                       | 1             | 12706499      |
| C03 | Y (same patient as C04) | 1             | 11249681      |
| C04 | Y (same patient as C03) | 1             | 11249682      |
| C05 | N                       | 44            | 12730802      |
| C06 | N                       | 213           | 12730803      |
| C07 | N                       | 213           | 12706498      |
| C08 | N                       | 213           | 11249677      |
| C09 | N                       | 222           | 12730806      |
| C10 | N                       | 222           | 11249614      |
| C11 | N                       | 222           | 11249679      |
| C12 | N                       | 1941          | 11249678      |
| C13 | N                       | 1941          | 11249680      |

**Table S4.** Environmental *Legionella pneumophila* isolates from hospital A: ID, site, NCBI number

| ID  | Site at Hospital A  | Sequence type | NCBI SAMN No. |
|-----|---------------------|---------------|---------------|
| E01 | Cooling tower       | Novel         | 12684123      |
| E02 | Cooling tower       | 1             | 12684124      |
| E03 | Cooling tower       | Novel         | 12684125      |
| E04 | Cooling tower       | 1             | 12684126      |
| E05 | Observation room 1  | 1             | 11100908      |
| E06 | Observation room 1  | 1             | 11101077      |
| E07 | Ice machine 1       | 1             | 12684127      |
| E08 | Patient room 1      | 1             | 12684128      |
| E09 | Patient room 2      | 1             | 12684129      |
| E10 | Patient room 2      | 1             | 12684130      |
| E11 | Ice machine 1       | 1             | 12684131      |
| E12 | Patient room 2      | 1             | 12684132      |
| E13 | Patient room 2      | 1             | 12684133      |
| E14 | Patient room 3      | 1             | 12684134      |
| E15 | Patient room 2      | 1             | 12684136      |
| E16 | Patient room 2      | 1             | 12684137      |
| E17 | Ice machine 1       | 1             | 12746497      |
| E18 | Patient room 1      | 1             | 12746498      |
| E19 | Patient room 2      | 1             | 12746499      |
| E20 | Patient room 2      | 1             | 12746500      |
| E21 | Drinking fountain 1 | 1             | 12684138      |
| E22 | Ice machine 1       | 1             | 12684139      |

**Table S5.** Incidence rate ratio (IRR) of LD in Census block groups with a centroid >2 miles, 1-2 miles and <1 mile from aerosol sources (AS) in 2014 and 2015 using Genesee County population data (Census.gov 2015). Cases with onset between Dec 1, 2014 and Mar 1, 2015 were excluded as, generally, cooling towers are not operational in winter. A multilevel Poisson model was nested in Census block groups and adjusted for age group, sex, interaction factor for proximity and year. An interaction factor for City of Flint water at the residence and year was included to test for the sensitivity of the model to this exposure variable.

A. Adjusted for City of Flint water at the residence (See Figure 5)

| 2014             |                           |      |        |       |
|------------------|---------------------------|------|--------|-------|
| Cooling tower ID | Distance category (miles) | IRR  | 95% CI |       |
| AS01             | > 2                       | 1    |        |       |
|                  | 1 - 2                     | 4.28 | 1.64   | 11.19 |
|                  | 0 - 1                     | 3.73 | 1.07   | 13.06 |
| AS02             | > 2                       | 1    |        |       |
|                  | 1 - 2                     | 3.86 | 1.47   | 10.13 |
|                  | 0 - 1                     | 3.87 | 1.11   | 13.56 |
| AS05             | > 2                       | 1    |        |       |
|                  | 1 - 2                     | 3.79 | 1.43   | 10.01 |
|                  | 0 - 1                     | 6.57 | 2.04   | 21.21 |
| AS100            | > 2                       | 1    |        |       |
|                  | 1 - 2                     | 2.63 | 0.92   | 7.51  |
|                  | 0 - 1                     | 4.42 | 1.38   | 14.13 |
| AS102            | > 2                       | 1    |        |       |
|                  | 1 - 2                     | 1.72 | 0.53   | 5.59  |
|                  | 0 - 1                     | 4.68 | 1.57   | 13.95 |

| 2015             |                           |      |        |       |
|------------------|---------------------------|------|--------|-------|
| Cooling tower ID | Distance category (miles) | IRR  | 95% CI |       |
| AS01             | > 2                       | 1    |        |       |
|                  | 1 - 2                     | 0.94 | 0.21   | 4.25  |
|                  | 0 - 1                     | 1.89 | 0.39   | 9.25  |
| AS02             | > 2                       | 1    |        |       |
|                  | 1 - 2                     | 0.85 | 0.19   | 3.89  |
|                  | 0 - 1                     | 1.94 | 0.4    | 9.52  |
| AS05             | > 2                       | 1    |        |       |
|                  | 1 - 2                     | 1.34 | 0.38   | 4.72  |
|                  | 0 - 1                     | 1.27 | 0.15   | 10.34 |
| AS100            | > 2                       | 1    |        |       |
|                  | 1 - 2                     | 2.11 | 0.64   | 6.91  |

|       |       |      |      |       |
|-------|-------|------|------|-------|
|       | 0 - 1 | 2.37 | 0.48 | 11.78 |
| AS102 | > 2   | 1    |      |       |
|       | 1 - 2 | 2.21 | 0.68 | 7.2   |
|       | 0 - 1 | 2.29 | 0.46 | 11.33 |

B. Unadjusted for City of Flint water at the residence

| Cooling tower ID | Distance category (miles) | IRR   | 95% CI |       |
|------------------|---------------------------|-------|--------|-------|
| AS01             | > 2                       | 1     |        |       |
|                  | 1 - 2                     | 6.75  | 2.82   | 16.16 |
|                  | 0 - 1                     | 6.59  | 2.08   | 20.83 |
| AS02             | > 2                       | 1     |        |       |
|                  | 1 - 2                     | 6.17  | 2.58   | 14.73 |
|                  | 0 - 1                     | 6.83  | 2.16   | 21.59 |
| AS05             | > 2                       | 1     |        |       |
|                  | 1 - 2                     | 5.68  | 2.30   | 14.02 |
|                  | 0 - 1                     | 11.20 | 3.81   | 32.96 |
| AS100            | > 2                       | 1     |        |       |
|                  | 1 - 2                     | 4.48  | 1.74   | 11.54 |
|                  | 0 - 1                     | 8.09  | 2.83   | 23.13 |
| AS102            | > 2                       | 1     |        |       |
|                  | 1 - 2                     | 3.02  | 1.01   | 9.05  |
|                  | 0 - 1                     | 8.98  | 3.35   | 24.07 |

| 2015             |                           |      |        |      |
|------------------|---------------------------|------|--------|------|
| Cooling tower ID | Distance category (miles) | IRR  | 95% CI |      |
| AS01             | > 2                       | 1    |        |      |
|                  | 1 - 2                     | 0.91 | 0.21   | 3.89 |
|                  | 0 - 1                     | 1.77 | 0.40   | 7.82 |
| AS02             | > 2                       | 1    |        |      |
|                  | 1 - 2                     | 0.83 | 0.19   | 3.55 |
|                  | 0 - 1                     | 1.84 | 0.42   | 8.11 |
| AS05             | > 2                       | 1    |        |      |
|                  | 1 - 2                     | 1.31 | 0.39   | 4.40 |
|                  | 0 - 1                     | 1.21 | 0.16   | 9.26 |
| AS100            | > 2                       | 1    |        |      |
|                  | 1 - 2                     | 1.78 | 0.61   | 5.18 |
|                  | 0 - 1                     | 1.93 | 0.44   | 8.44 |
| AS102            | > 2                       | 1    |        |      |
|                  | 1 - 2                     | 1.88 | 0.65   | 5.47 |
|                  | 0 - 1                     | 1.86 | 0.42   | 8.17 |



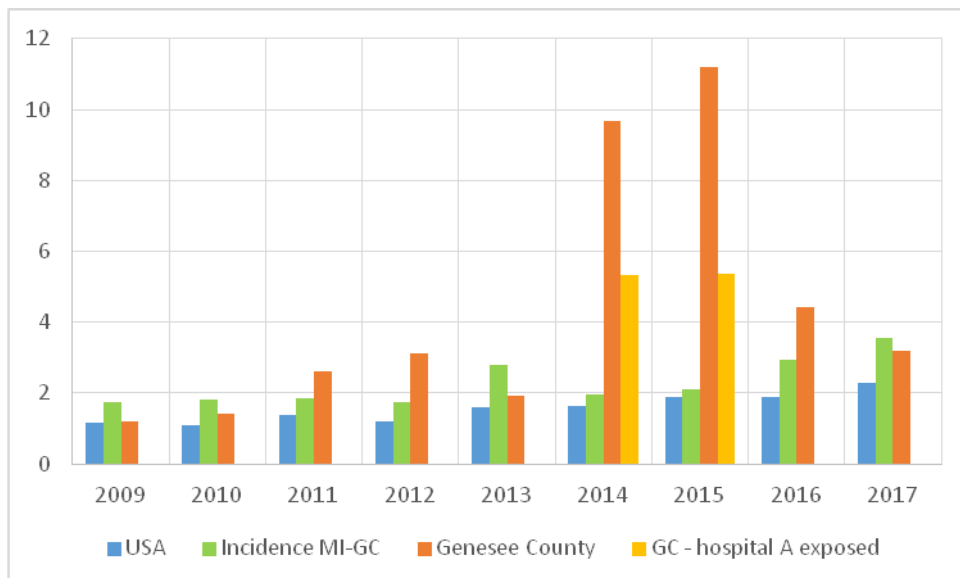

**Figure S1.** Crude incidence of Legionnaires' disease per 100.000 over the years 2009 – 2017 in the United State of America (USA, blue (National Notifiable Diseases Surveillance System)), in Michigan (without Genesee County MI-GC, green) and in Genesee County, MI (Genesee County, orange) based on recorded LD cases in the Michigan Disease Surveillance System and United States Census Bureau population data.

Monitoring site 1

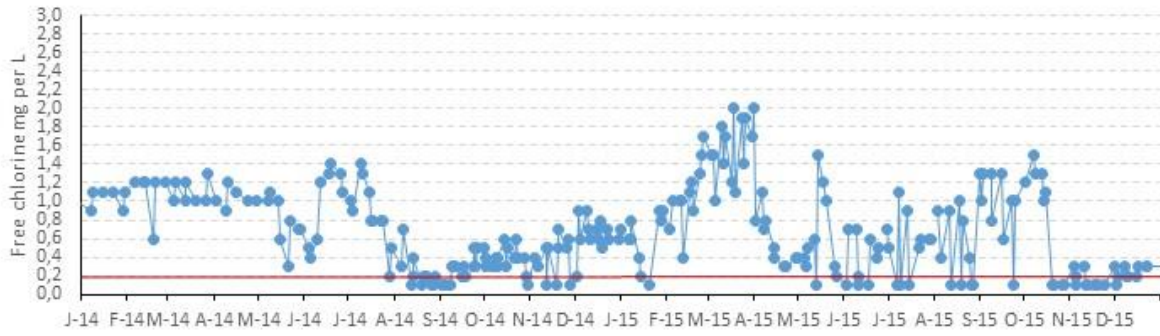

Monitoring site 2

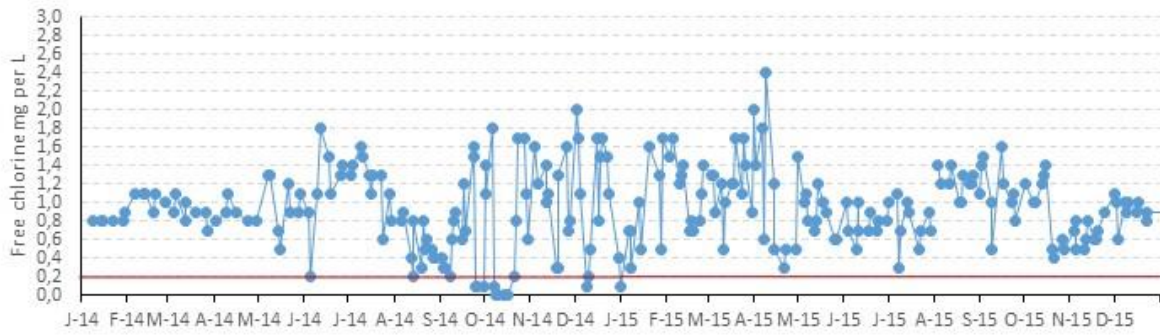

Monitoring site 3

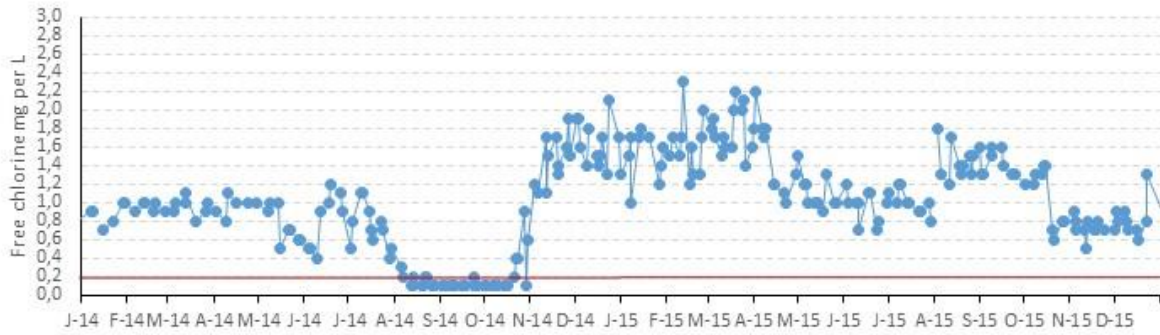

Monitoring site 4

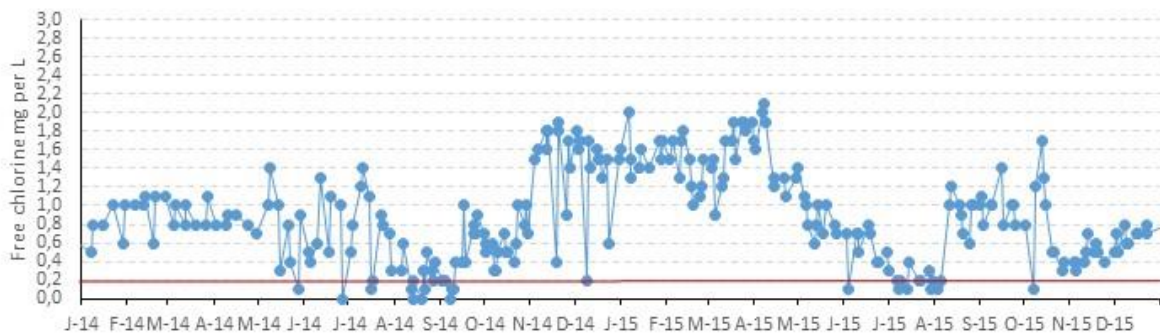

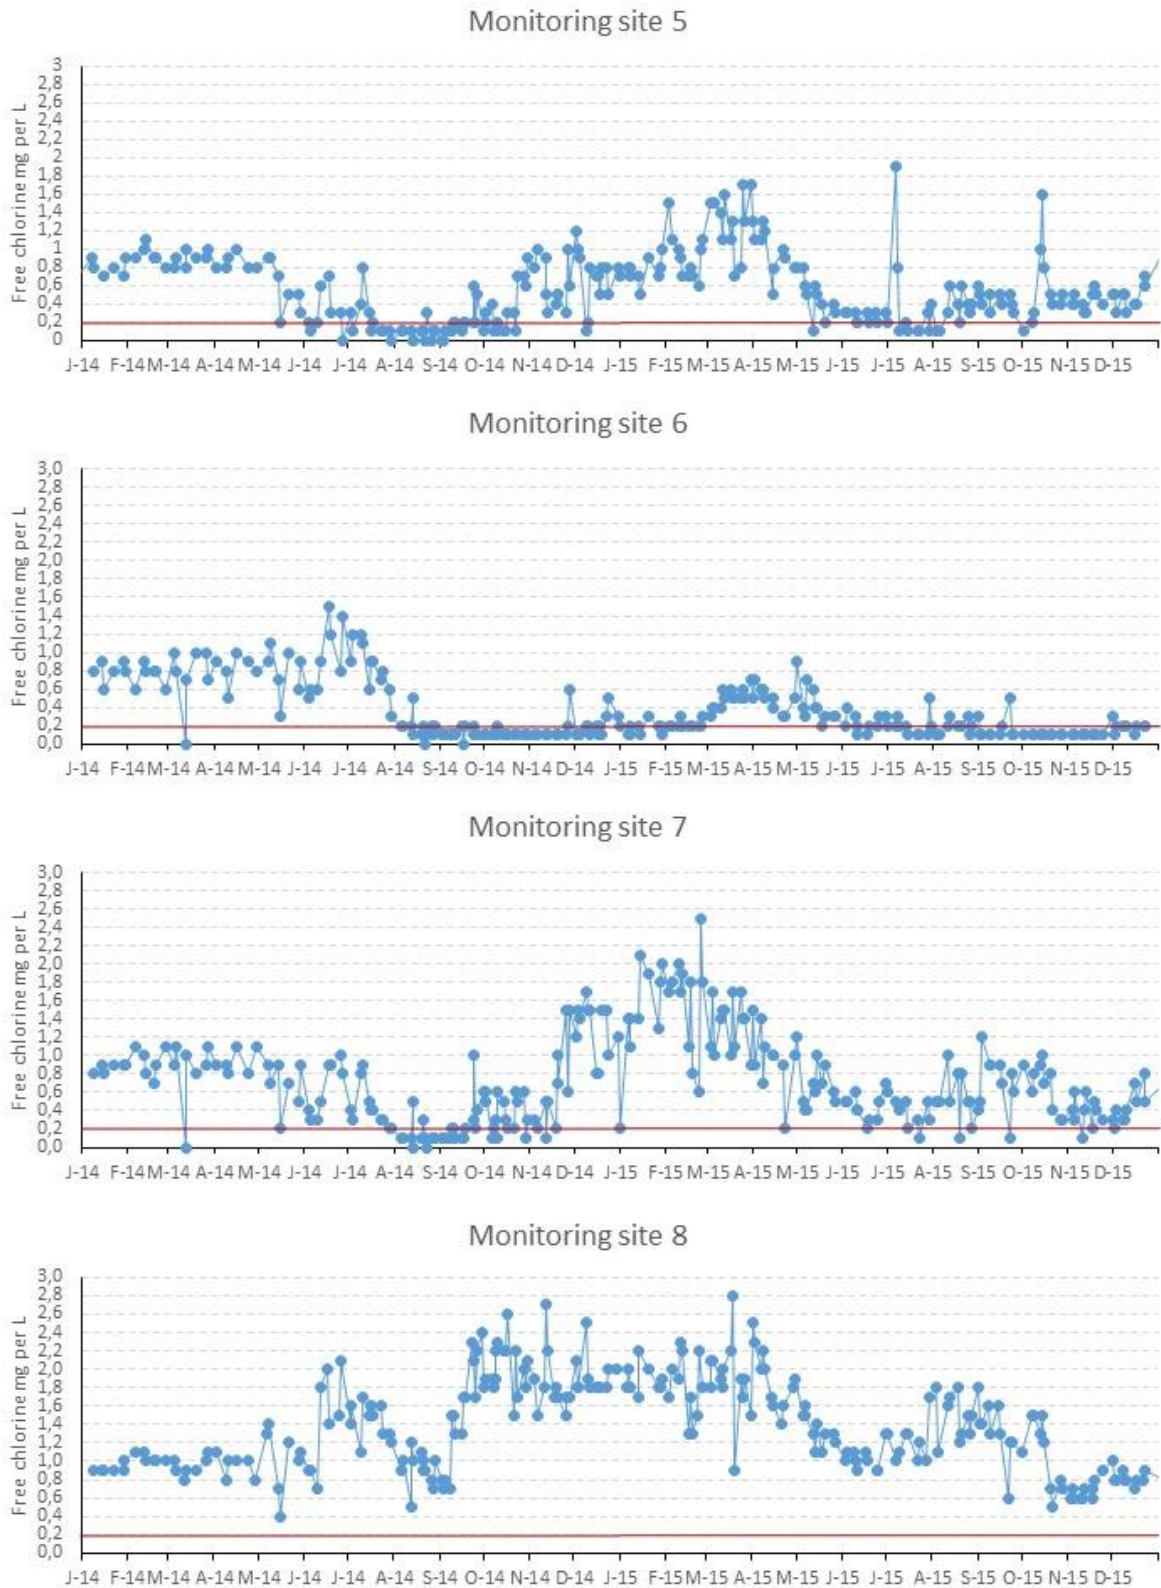

**Figure S2.** Results of free chlorine monitoring at eight fixed monitoring sites (1-8) in the distribution network throughout Flint. These sites were shops, businesses or community service centers where a City of Flint official went to take measurements and samples. X-axes show months in 2014 and 2015 (m-yy); y-axes show free chlorine concentration in mg per L. Red line is 0.2 mg/l, recommended best practice (American Water Works Association, 2007).

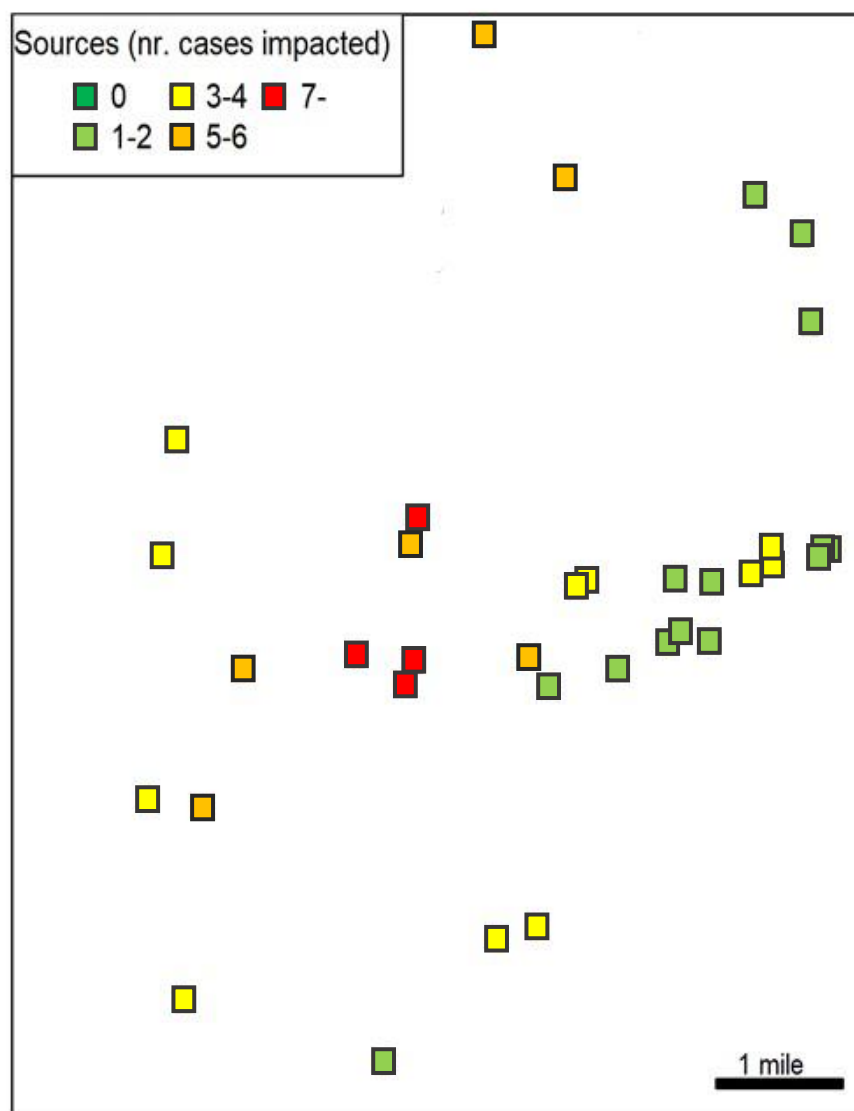

**Figure S3.** Results of the Gaussian plume model: spatial distribution of the highest impact aerosol sources (shown as squares), and the number of cases that are potentially impacted by each aerosol source (shown as color/shade) evaluated with intermediate aerosol concentration threshold ( $>0.0001\text{g}/\text{m}^2$ ). Aerosol exposure during hospital stays and visits were excluded.

## References

American Water Works Association, 2007. Partnership for safe water. Distribution. <https://www.awwa.org/AWWA-Articles/tech-tip-chlorine-residual-measurement>
